## Correction for: Machine learning-based B cell-related diagnostic biomarker signature and molecular subtypes characteristic of ulcerative colitis

Guo-Liang Wu<sup>1,2</sup>, Li Li<sup>3</sup>, Xiao-Yao Chen<sup>2</sup>, Wei-Feng Zhang<sup>4,5</sup>, Jun-Bo Wu<sup>6</sup>, Xiaoning Yu<sup>7</sup>, Hong-Jin Chen<sup>5</sup>

<sup>1</sup>First Clinical Medical College, Nanjing University of Chinese Medicine, Nanjing, Jiangsu 210023, China

<sup>2</sup>Department of Anorectal Section, The First Affiliated Hospital of Shandong First Medical University, Jinan, Shandong 250014, China

<sup>3</sup>Department of Endocrinology, The Affiliated Hospital of Shandong University of Traditional Chinese Medicine, Jinan, Shandong 250014, China

<sup>4</sup>Department of Colorectal Surgery, The Affiliated Hospital of Nanjing University of Chinese Medicine, Nanjing, Jiangsu 210029, China

<sup>5</sup>Department of Anorectal Section, The Affiliated Hospital of Xuzhou Medical University, Xuzhou, Jiangsu 221000, China

<sup>6</sup>Department of Colorectal Surgery, Hengyang Central Hospital, Hengyang, Hunan 421001, China

<sup>7</sup>Department of Geriatrics, Hematology and Oncology Unit, Qilu Hospital of Shandong University, Jinan, China

**Correspondence to:** Hong-Jin Chen, Xiaoning Yu; **email:** [260789@njucm.edu.cn](mailto:260789@njucm.edu.cn); [yuxiaoning7709@163.com](mailto:yuxiaoning7709@163.com), <https://orcid.org/0009-0008-6441-2801>

**Keywords:** ulcerative colitis, B cell-related genes, diagnostic biomarker, immune infiltration, machine learning

**Original article:** [Aging \(Albany NY\) 2024; 16: pp 2774-2788](#)

PMID: [38319729](#)

PMCID: [PMC10911385](#)

doi: [10.18632/aging.205510](#)

**This article has been corrected:** The authors found that there was an error in the published affiliation for the corresponding author, Hong-Jin Chen. The correct affiliation is “<sup>4</sup>Department of Colorectal Surgery, The Affiliated Hospital of Nanjing University of Chinese Medicine, Nanjing, Jiangsu 210029, China.”

The full list of authors with their correctly assigned affiliations is provided below:

Guo-Liang Wu<sup>1,2</sup>, Li Li<sup>3</sup>, Xiao-Yao Chen<sup>2</sup>, Wei-Feng Zhang<sup>4,5</sup>, Jun-Bo Wu<sup>6</sup>, Xiaoning Yu<sup>7</sup>, Hong-Jin Chen<sup>4</sup>

<sup>1</sup>First Clinical Medical College, Nanjing University of Chinese Medicine, Nanjing, Jiangsu 210023, China

<sup>2</sup>Department of Anorectal Section, The First Affiliated Hospital of Shandong First Medical University, Jinan, Shandong 250014, China

<sup>3</sup>Department of Endocrinology, The Affiliated Hospital of Shandong University of Traditional Chinese Medicine, Jinan, Shandong 250014, China

<sup>4</sup>Department of Colorectal Surgery, The Affiliated Hospital of Nanjing University of Chinese Medicine, Nanjing, Jiangsu 210029, China

<sup>5</sup>Department of Anorectal Section, The Affiliated Hospital of Xuzhou Medical University, Xuzhou, Jiangsu 221000, China

<sup>6</sup>Department of Colorectal Surgery, Hengyang Central Hospital, Hengyang, Hunan 421001, China

<sup>7</sup>Department of Geriatrics, Hematology and Oncology Unit, Qilu Hospital of Shandong University, Jinan, China
